# Supplementary material for: Circulating circRNA predicting the occurrence of hepatocellular carcinoma in patients with HBV infection
Source: PubMed Central journal article supplement (PMC7520265; doi:10.1111/jcmm.15635), 2020-07-21

## **Supplementary Files**

**Table S1.** Clinicopathological features of surgical hepatocellular carcinoma (HCC), chronic hepatitis (CH) and cancer-free control samples.

**Table S2.** Risk score analysis of three circRNAs as fingerprints in HCC and cancer-free control plasma samples.

**Table S3.** Risk score analysis of three circRNAs as fingerprints in HCC and CH group.

**Table S4.** Primers for Quantitative RT- PCR

**Supplementary Information 1.** Detailed expression of circRNA

**Supplementary Information 2.** Risk score in all samples

**Fig. S1.** Expression stability examination of three circulating circRNAs. The circRNA obtained from three healthy controls plasma samples were incubated at room temperature for 12h, 24h or subjecting it to up to 3 cycles of freezing and thawing. Data were presented as plot of the mean with SD. No significant difference was observed in each group.

**Table S1. Clinicopathological features of surgical hepatocellular carcinoma (HCC), chronic hepatitis (CH) and cancer-free control samples**

|                              | HCC         | CH          | Control     | P value                  |
|------------------------------|-------------|-------------|-------------|--------------------------|
| N                            | 200         | 200         | 200         |                          |
| Age Mean (SE) year           | 55.43(12.4) | 56.89(11.8) | 56.79(11.6) | <b>0.33<sup>a</sup></b>  |
| Sex (male/female)            | 160/40      | 157/43      | 162/38      | <b>0.28<sup>b</sup></b>  |
| <b>Differentiation grade</b> |             |             |             |                          |
| Well                         | 92          |             |             |                          |
| Moderate                     | 55          |             |             |                          |
| Poorly                       | 53          |             |             |                          |
| <b>Tumor Size(cm)</b>        |             |             |             |                          |
| ≤5cm                         | 109         |             |             |                          |
| >5cm                         | 891         |             |             |                          |
| <b>Tumor Number</b>          |             |             |             |                          |
| Solitary                     | 78          |             |             |                          |
| Multiple                     | 122         |             |             |                          |
| <b>Tumor Capsular</b>        |             |             |             |                          |
| Incomplete                   | 12          |             |             |                          |
| Complete                     | 188         |             |             |                          |
| <b>AFP(ng/mL)</b>            | 31.3(12.6)  | 29.2(10.3)  | 20.2(9.2)   | <b>0.032<sup>a</sup></b> |
| <b>TNM stage(I:II:III)</b>   | 94: 54: 52  |             |             |                          |
| <b>HBV</b>                   |             |             |             |                          |
| Yes                          | 200         | 200         | /           | <b>1.00<sup>b</sup></b>  |
| No                           | 0           | 0           | /           |                          |

<sup>a</sup> Student t-test.

<sup>b</sup> Chi-square test.

**Table S2: Risk score analysis of in hepatocellular carcinoma HCC and cancer-free control plasma samples**

| Score                 | 0-9.734 | 9.734-12.112 | PPV <sup>a</sup> | NPV <sup>b</sup> |
|-----------------------|---------|--------------|------------------|------------------|
| <b>Training set</b>   |         |              | 0.95             | 0.95             |
| HCC                   | 1       | 19           |                  |                  |
| Control               | 19      | 1            |                  |                  |
| <b>Validation set</b> |         |              | 0.80             | 0.95             |
| HCC                   | 36      | 144          |                  |                  |
| Control               | 171     | 9            |                  |                  |

<sup>a</sup> PPV, positive predictive value

<sup>b</sup> NPV, negative predictive value

**Table S3: Risk score analysis of in hepatocellular carcinoma HCC and CH**

**plasma samples**

| <b>Score</b>          | <b>0-6.778</b> | <b>6.778-8.332</b> | <b>PPV<sup>a</sup></b> | <b>NPV<sup>b</sup></b> |
|-----------------------|----------------|--------------------|------------------------|------------------------|
| <b>Training set</b>   |                |                    | 0.90                   | 0.95                   |
| HCC                   | 2              | 18                 |                        |                        |
| CH                    | 19             | 1                  |                        |                        |
| <b>Validation set</b> |                |                    | 0.84                   | 0.80                   |
| HCC                   | 29             | 151                |                        |                        |
| CH                    | 144            | 36                 |                        |                        |

<sup>a</sup> PPV, positive predictive value

<sup>b</sup> NPV, negative predictive value

**Table S4. Primers for Quantitative RT- PCR**

---

| <b>Gene name</b> | <b>All Patients</b> | <b>Sequence</b>         |
|------------------|---------------------|-------------------------|
| circ_0015138     | Forward Primer      | TGCAGAAGTTACCACAGGCA    |
|                  | Reverse Primer      | CTTGGAAGCCGCAGAGGAGG    |
| circ_0125297     | Forward Primer      | GGTTAATTGGCAGATCCCAA    |
|                  | Reverse Primer      | GCGGTTAAGAAGCGATTTAG    |
| Circ_0037120     | Forward Primer      | TGGGTTCTGATGTTAGTCTT    |
|                  | Reverse Primer      | GGCCACGAATTCATGCTAGT    |
| Circ_0009582     | Forward Primer      | GAGTGGTGTTATCCCGAGAG    |
|                  | Reverse Primer      | GGGAATTGGTTCATCATGCG    |
| Circ_0140117     | Forward Primer      | GACGACATTTACCTCG        |
|                  | Reverse Primer      | CCCATTTTGACAGCTTGGAT    |
| GAPDH            | Forward Primer      | GGAGCGAGATCCCTCCAAAAT   |
|                  | Reverse Primer      | GGCTGTTGTCATACTTCTCATGG |

---

Relative expression of circ\_0009582

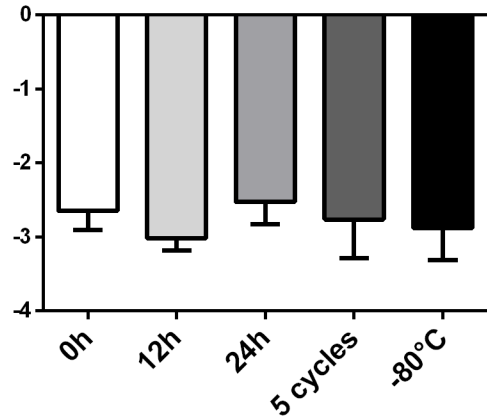

Relative expression of circ\_0037120

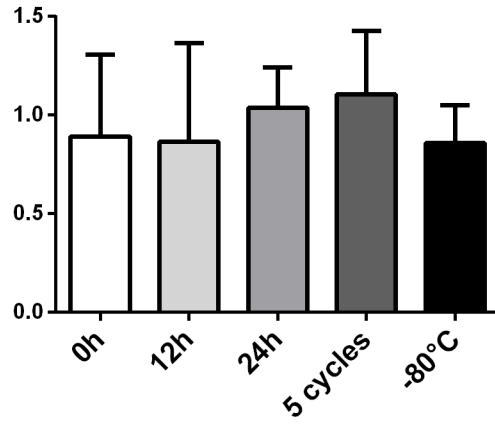

Relative expression level circ\_0140117

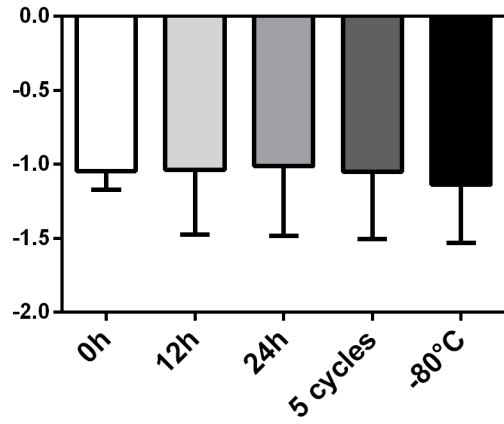

Supplement: JCMM-24-10216-s001.pdf [file JCMM-24-10216-s001.pdf]
